# Supplementary material for: An ultraviolet excitation anti-counterfeiting material of Sb3+ doped Cs2ZrCl6 vacancy-ordered double perovskite
Source: Royal Society of Chemistry journal article supplement (doi:10.1039/d1qi00639h), 2021-01-01
Supplement: d1qi00639h1.pdf [file d1qi00639h1.pdf]

## **Electronic Supplementary Information**

**An Ultraviolet Excitation Anti-Counterfeiting Materials of  $\text{Sb}^{3+}$**

**Doped  $\text{Cs}_2\text{ZrCl}_6$  Vacancy-Ordered Double Perovskite**

**Ruxin Liu, Wenjing Liu, Guojing Li, Wenjun Zhang\***

**School of Chemical Engineering, Hebei University of Technology, Tianjin, 300130, China**

**Correspondence information: Wenjun Zhang, Institute of Chemical Technology, Hebei University of  
Technology, E-mail: [wjzhang@hebut.edu.cn](mailto:wjzhang@hebut.edu.cn). Fax: +022 6020 4294**

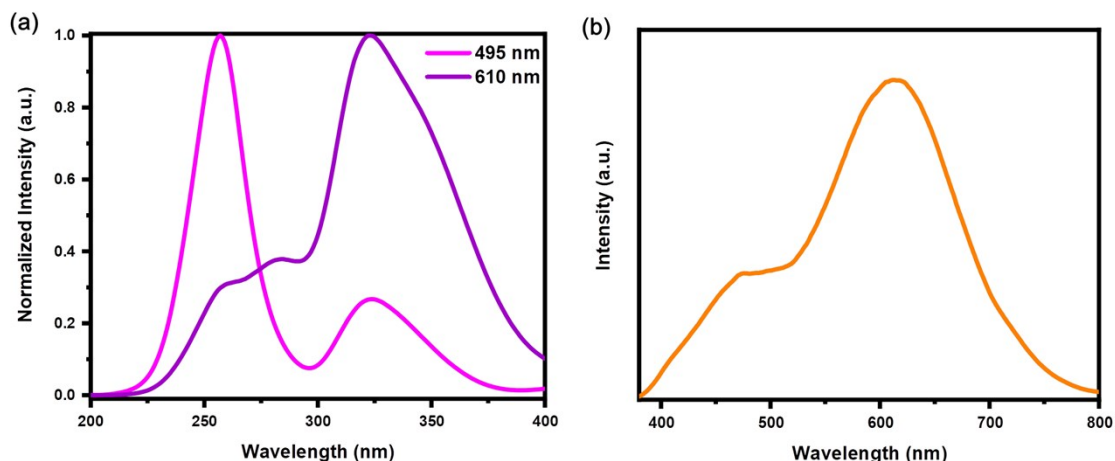

**Figure S1.** (a) PLE and (b) PL spectra of 1% Sb<sup>3+</sup> doped Cs<sub>2</sub>ZrCl<sub>6</sub> (monitoring at emission wavelength of 495 nm and 610 nm, excited by 285 nm).

**Table S1.** EDS results (atom%) from the points on the selected 10% Sb<sup>3+</sup> doped Cs<sub>2</sub>ZrCl<sub>6</sub> particle.

| Element    | Cs    | Zr    | Sb   | Cl    |
|------------|-------|-------|------|-------|
| Proportion | 23.70 | 13.15 | 3.26 | 59.89 |

**Table S2.** feed ratio and ICP-OES results of Sb/(Sb + Zr).

| feed ratio | ICP-OES results |
|------------|-----------------|
| 1%         | 0.34%           |
| 4%         | 1.61%           |
| 7%         | 2.94%           |
| 10%        | 3.53%           |
| 15%        | 4.36%           |
| 20%        | 5.72%           |

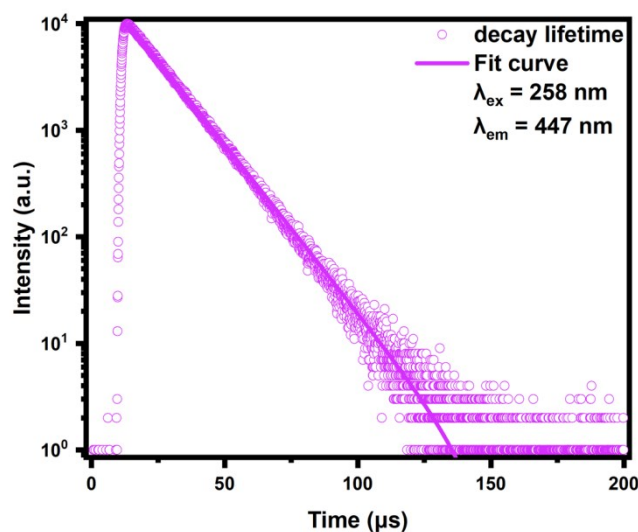

**Figure S2.** Time-resolved PL spectra of Cs<sub>2</sub>ZrCl<sub>6</sub>,  $\lambda_{\text{ex}} = 258 \text{ nm}$ ,  $\lambda_{\text{em}} = 447 \text{ nm}$ .

**Table S3.** PL lifetime of 10% Sb<sup>3+</sup> doped Cs<sub>2</sub>ZrCl<sub>6</sub>.

| Wavelength        | Lifetime                                     | $\tau_{ave}$ |
|-------------------|----------------------------------------------|--------------|
| 258 nm and 447 nm | 1.05 $\mu$ s (63.28%) 11.29 $\mu$ s (36.72%) | 2.41 $\mu$ s |
| 285 nm and 610 nm | 8.57 $\mu$ s                                 |              |
| 325 nm and 496 nm | 1.00 $\mu$ s (35.97%) 9.86 $\mu$ s (64.03%)  | 3.34 $\mu$ s |
| 365 nm and 610 nm | 10.50 $\mu$ s                                |              |

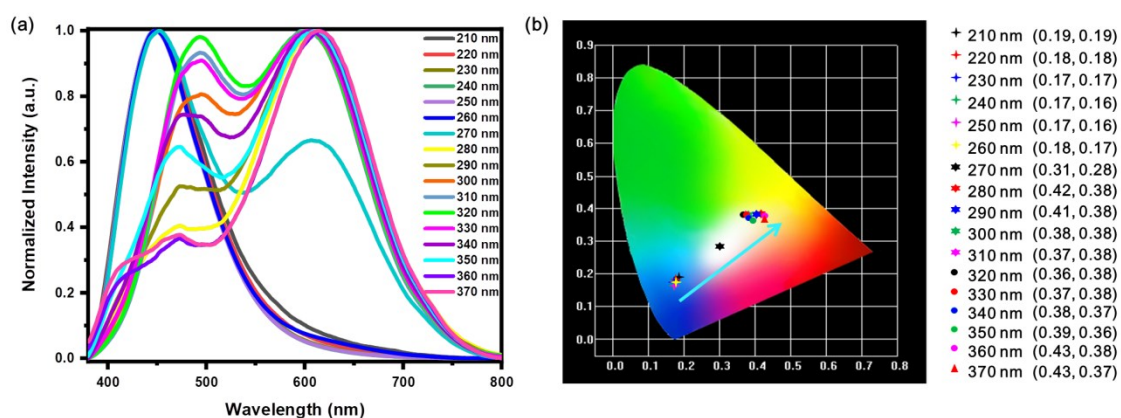

**Figure S3.** (a) Wavelength-dependent PL spectra and (b) CIE color coordinates of 1% Sb<sup>3+</sup> doped Cs<sub>2</sub>ZrCl<sub>6</sub> at different excitation wavelengths for 1% Sb<sup>3+</sup> doped Cs<sub>2</sub>ZrCl<sub>6</sub>.

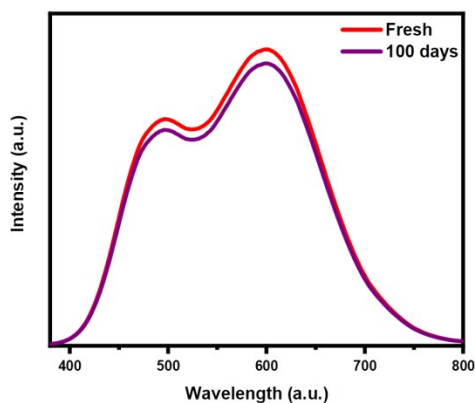

**Figure S4.** PL intensity of 10% Sb<sup>3+</sup> doped Cs<sub>2</sub>ZrCl<sub>6</sub> for fresh and 100 days under natural conditions.

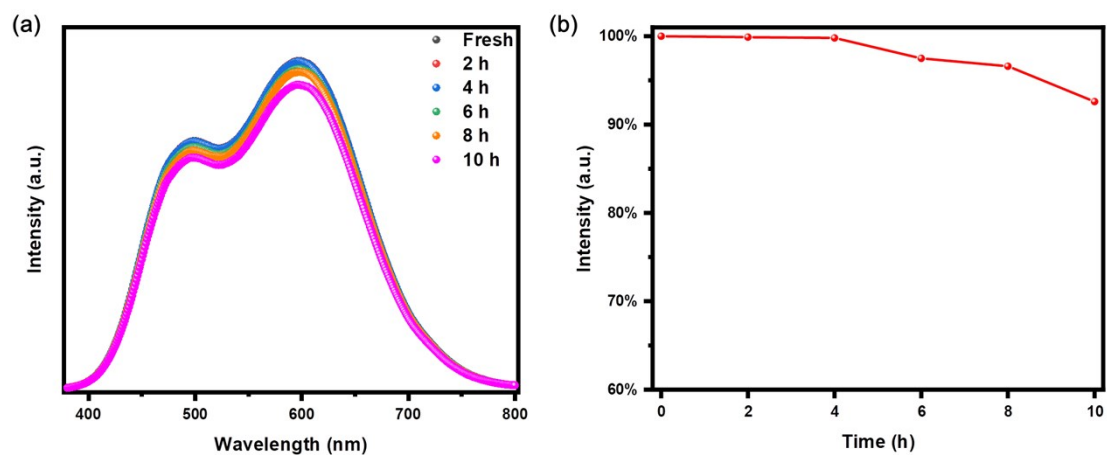

**Figure S5.** (a) Emission spectra of the fresh 10% Sb<sup>3+</sup> doped Cs<sub>2</sub>ZrCl<sub>6</sub> after water vapor treatment at different times (relative humidity maintained at 100%). (b) The PL intensity of the samples changes.
